# Supplementary material
Source: MDPI journal article supplement (https://www.mdpi.com/2071-1050/15/8/7006)
Supplement: s1 [file s1]

**\* Questionnaire of paired comparisons**

**Linguistic scales to express the degree of importance**

| code | Linguistic scale for degree of importance |
|------|-------------------------------------------|
| 1    | Just equal                                |
| 2    | Equally Important (EI)                    |
| 3    | Weakly more Important (WMI)               |
| 4    | Strongly more Important (SMI)             |
| 5    | Very strongly more Important (VSMI)       |
| 6    | Absolutely more Important                 |

| Criterion            | Environmental | Physical | Economic | Managerial | Social   |
|----------------------|---------------|----------|----------|------------|----------|
| <b>Environmental</b> | <b>1</b>      |          |          |            |          |
| <b>Physical</b>      | *             | <b>1</b> |          |            |          |
| <b>Economic</b>      | *             | *        | <b>1</b> |            |          |
| <b>Managerial</b>    | *             | *        | *        | <b>1</b>   |          |
| <b>Social</b>        | *             | *        | *        | *          | <b>1</b> |

| <b>Environmental indicators</b>                                  | Prevent the spread of various types of pollution | Revival of vegetation | Use of renewable energy | Production of renewable and carbon-free energy | Protection of environmental resources and basic resources | Protection and strengthening of biological and natural corridors |
|------------------------------------------------------------------|--------------------------------------------------|-----------------------|-------------------------|------------------------------------------------|-----------------------------------------------------------|------------------------------------------------------------------|
| Prevent the spread of various types of pollution                 | <b>1</b>                                         |                       |                         |                                                |                                                           |                                                                  |
| Revival of vegetation                                            | *                                                | <b>1</b>              |                         |                                                |                                                           |                                                                  |
| Use of renewable energy                                          | *                                                | *                     | <b>1</b>                |                                                |                                                           |                                                                  |
| Production of renewable and carbon-free energy                   | *                                                | *                     | *                       | <b>1</b>                                       |                                                           |                                                                  |
| Protection of environmental resources and basic resources        | *                                                | *                     | *                       | *                                              | <b>1</b>                                                  |                                                                  |
| Protection and strengthening of biological and natural corridors | *                                                | *                     | *                       | *                                              | *                                                         | <b>1</b>                                                         |

| <b>Physical indicators</b> | Preventing excessive and | Use of public transportation | Reuse of brownfields and | Recovery and improvement of | Taking advantage of a legible, diverse and |
|----------------------------|--------------------------|------------------------------|--------------------------|-----------------------------|--------------------------------------------|
|----------------------------|--------------------------|------------------------------|--------------------------|-----------------------------|--------------------------------------------|

|                                                                           | unconventional urban growth | and clean energy | existing buildings | damaged biological areas | human-oriented urban structure |
|---------------------------------------------------------------------------|-----------------------------|------------------|--------------------|--------------------------|--------------------------------|
| Preventing excessive and unconventional urban growth                      | <b>1</b>                    |                  |                    |                          |                                |
| Use of public transportation and clean energy                             | *                           | <b>1</b>         |                    |                          |                                |
| Reuse of brownfields and existing buildings                               | *                           | *                | <b>1</b>           |                          |                                |
| Recovery and improvement of damaged biological areas                      | *                           | *                | *                  | <b>1</b>                 |                                |
| Taking advantage of a legible, diverse and human-oriented urban structure | *                           | *                | *                  | *                        | <b>1</b>                       |

| <b>Economic indicators</b>                                          | Independent and self-sufficient local economy | The existence of local markets for farmers | Job opportunities appropriate to the cultural and local environment | Promoting simple living and reducing resource consumption |
|---------------------------------------------------------------------|-----------------------------------------------|--------------------------------------------|---------------------------------------------------------------------|-----------------------------------------------------------|
| Independent and self-sufficient local economy                       | <b>1</b>                                      |                                            |                                                                     |                                                           |
| The existence of local markets for farmers                          | *                                             | <b>1</b>                                   |                                                                     |                                                           |
| Job opportunities appropriate to the cultural and local environment | *                                             | *                                          | <b>1</b>                                                            |                                                           |
| Promoting simple living and reducing resource consumption           | *                                             | *                                          | *                                                                   | <b>1</b>                                                  |

| <b>Managerial indicators</b>                                                                | Restoration of the damaged and destroyed environment | Development of green technologies and services | Preparation and compilation of ecological laws and regulations | Improving the state of waste and garbage and urban sewage | Using effective and powerful workforce instead of consuming resources, energy and materials |
|---------------------------------------------------------------------------------------------|------------------------------------------------------|------------------------------------------------|----------------------------------------------------------------|-----------------------------------------------------------|---------------------------------------------------------------------------------------------|
| Restoration of the damaged and destroyed environment                                        | <b>1</b>                                             |                                                |                                                                |                                                           |                                                                                             |
| Development of green technologies and services                                              | *                                                    | <b>1</b>                                       |                                                                |                                                           |                                                                                             |
| Preparation and compilation of ecological laws and regulations                              | *                                                    | *                                              | <b>1</b>                                                       |                                                           |                                                                                             |
| Improving the state of waste and garbage and urban sewage                                   | *                                                    | *                                              | *                                                              | <b>1</b>                                                  |                                                                                             |
| Using effective and powerful workforce instead of consuming resources, energy and materials | *                                                    | *                                              | *                                                              | *                                                         | <b>1</b>                                                                                    |

| <b>Social indicators</b>                                                   | A sense of belonging to a place of residence | Community empowerment in terms of participation and decision making | Social order and adaptability to environmental changes | Increasing public awareness in the field of environmental sustainability | Appreciating the respect for nature | Education and culture development to produce less waste and save resources |
|----------------------------------------------------------------------------|----------------------------------------------|---------------------------------------------------------------------|--------------------------------------------------------|--------------------------------------------------------------------------|-------------------------------------|----------------------------------------------------------------------------|
| A sense of belonging to a place of residence                               | <b>1</b>                                     |                                                                     |                                                        |                                                                          |                                     |                                                                            |
| Community empowerment in terms of participation and decision making        | *                                            | <b>1</b>                                                            |                                                        |                                                                          |                                     |                                                                            |
| Social order and adaptability to environmental changes                     | *                                            | *                                                                   | <b>1</b>                                               |                                                                          |                                     |                                                                            |
| Increasing public awareness in the field of environmental sustainability   | *                                            | *                                                                   | *                                                      | <b>1</b>                                                                 |                                     |                                                                            |
| Appreciating the respect for nature                                        | *                                            | *                                                                   | *                                                      | *                                                                        | <b>1</b>                            |                                                                            |
| Education and culture development to produce less waste and save resources | *                                            | *                                                                   | *                                                      | *                                                                        | *                                   | <b>1</b>                                                                   |

| <b>Criterion</b>     | <b>Indicator</b>                                                          | <b>degree of importance</b> |                  |                              |                     |                             |
|----------------------|---------------------------------------------------------------------------|-----------------------------|------------------|------------------------------|---------------------|-----------------------------|
|                      |                                                                           | <b>Totally agree (5)</b>    | <b>Agree (4)</b> | <b>I have no opinion (3)</b> | <b>Disagree (2)</b> | <b>Totally disagree (1)</b> |
| <b>Environmental</b> | Prevent the spread of various types of pollution                          |                             |                  |                              |                     |                             |
|                      | Revival of vegetation                                                     |                             |                  |                              |                     |                             |
|                      | Use of renewable energy                                                   |                             |                  |                              |                     |                             |
|                      | Production of renewable and carbon-free energy                            |                             |                  |                              |                     |                             |
|                      | Protection of environmental resources and basic resources                 |                             |                  |                              |                     |                             |
|                      | Protection and strengthening of biological and natural corridors          |                             |                  |                              |                     |                             |
| <b>Physical</b>      | Preventing excessive and unconventional urban growth                      |                             |                  |                              |                     |                             |
|                      | Use of public transportation and clean energy                             |                             |                  |                              |                     |                             |
|                      | Reuse of brownfields and existing buildings                               |                             |                  |                              |                     |                             |
|                      | Recovery and improvement of damaged biological areas                      |                             |                  |                              |                     |                             |
|                      | Taking advantage of a legible, diverse and human-oriented urban structure |                             |                  |                              |                     |                             |
|                      | Independent and self-sufficient local economy                             |                             |                  |                              |                     |                             |
|                      | The existence of local markets for farmers                                |                             |                  |                              |                     |                             |

|                   |                                                                                             |  |  |  |  |  |
|-------------------|---------------------------------------------------------------------------------------------|--|--|--|--|--|
| <b>Economic</b>   | Job opportunities appropriate to the cultural and local environment                         |  |  |  |  |  |
|                   | Promoting simple living and reducing resource consumption                                   |  |  |  |  |  |
| <b>Managerial</b> | Restoration of the damaged and destroyed environment                                        |  |  |  |  |  |
|                   | Development of green technologies and services                                              |  |  |  |  |  |
|                   | Preparation and compilation of ecological laws and regulations                              |  |  |  |  |  |
|                   | Improving the state of waste and garbage and urban sewage                                   |  |  |  |  |  |
|                   | Using effective and powerful workforce instead of consuming resources, energy and materials |  |  |  |  |  |
| <b>Social</b>     | A sense of belonging to a place of residence                                                |  |  |  |  |  |
|                   | Community empowerment in terms of participation and decision making                         |  |  |  |  |  |
|                   | Social order and adaptability to environmental changes                                      |  |  |  |  |  |
|                   | Increasing public awareness in the field of environmental sustainability                    |  |  |  |  |  |
|                   | Appreciating the respect for nature                                                         |  |  |  |  |  |
|                   | Education and culture development to produce less waste and save resources                  |  |  |  |  |  |
